# Supplementary material
Source: PubMed Central journal article supplement (PMC3880829)
Supplement: NIHMS523551-supplement-supplement_1.pdf [file NIHMS523551-supplement-supplement_1.pdf]

**Supplemental Table 1.** Correlation between the amplitudes of pupil response to full field stimulation with different colors measured by pupillography among glaucoma patients and controls

| Glaucoma | Control |       |      |       |      |        |
|----------|---------|-------|------|-------|------|--------|
|          |         | White | Red  | Green | Blue | Yellow |
|          | White   |       | 0.91 | 0.91  | 0.92 | 0.94   |
|          | Red     | 0.89  |      | 0.89  | 0.90 | 0.91   |
|          | Green   | 0.95  | 0.89 |       | 0.94 | 0.94   |
|          | Blue    | 0.93  | 0.91 | 0.95  |      | 0.92   |
|          | Yellow  | 0.96  | 0.91 | 0.96  | 0.94 |        |

Presented Pearson correlation coefficient of the right eye for each individual.

All pairwise correlations were significant ( $p$ -value $<0.05$ ) after Bonferroni correction.

**Supplemental Table 2.** Correlation between the amplitudes of pupil response to stimulation of varied patterns and intensities measured by pupillography among normal subjects and glaucoma patients

|                 |                   | <b>Control</b>    |                   |                |
|-----------------|-------------------|-------------------|-------------------|----------------|
| <b>Glaucoma</b> |                   | Full field Bright | Peripheral Bright | Peripheral Dim |
|                 | Full field Bright |                   | 0.85              | 0.78           |
|                 | Peripheral Bright | 0.83              |                   | 0.77           |
|                 | Peripheral Dim    | 0.88              | 0.85              |                |

Presented Pearson correlation coefficient of the eye with smaller amplitude for each individual.

All pairwise correlations were significant (p-value<0.05) after Bonferroni correction.

**Supplemental Table 3.** Associative models in detecting glaucoma using pupillography developed by different methods and their

sensitivity, specificity, and area under the receiver operating characteristics curve (AUROC). Within-eye pupil metrics were centered at the mean of controls instead of zero

|                                     | Odds ratio (95% Confidence Interval) |                     |                     |                                                  |                     |
|-------------------------------------|--------------------------------------|---------------------|---------------------|--------------------------------------------------|---------------------|
|                                     | Univariate                           | Combined model      | Stepwise forward    | Forward selection (Akaike information criterion) | Full model          |
| <b>Age</b> (per 1 year older)       | 1.06 (1.03 to 1.10)                  | 1.04 (1.00 to 1.08) | 1.03 (0.99 to 1.07) | 1.03 (0.99 to 1.07)                              | 1.03 (0.99 to 1.08) |
| <b>Between-eye</b>                  |                                      |                     |                     |                                                  |                     |
| Amplitude (per 0.1 unit)            | 1.97 (1.55 to 2.51)                  | 1.78 (1.38 to 2.28) | 1.70 (1.29 to 2.12) | 1.64 (1.26 to 2.13)                              | 1.67 (1.27 to 2.19) |
| Latency (per 0.1 unit)              | 1.35 (1.10 to 1.65)                  | -                   | -                   | -                                                | 0.98 (0.74 to 1.30) |
| Time to Max Dilation (per 0.1 unit) | 1.87 (1.42 to 2.46)                  | -                   | 1.60 (1.15 to 2.24) | 1.60 (1.14 to 2.25)                              | 1.52 (1.06 to 2.17) |
| <b>Within-eye</b>                   |                                      |                     |                     |                                                  |                     |
| Amplitude (per 0.1 unit)            | 1.07 (1.02 to 1.12)                  | 1.06 (1.00 to 1.11) | -                   | -                                                | 1.03 (0.97 to 1.10) |
| Latency (per 0.1 unit)              | 1.05 (1.00 to 1.10)                  | -                   | -                   | -                                                | 0.99 (0.93 to 1.05) |
| Time to Max Dilation (per 0.1 unit) | 1.18 (1.06 to 1.31)                  | -                   | 1.17 (1.02 to 1.31) | 1.17 (1.02 to 1.33)                              | 1.17 (1.02 to 1.34) |
| <b>Individual-eye</b>               |                                      |                     |                     |                                                  |                     |
| Amplitude (per 0.1 ratio decrease)  | 5.36 (2.77 to 10.38)                 | 2.13 (0.99 to 4.55) | -                   | 1.83 (0.78 to 4.29)                              | 2.26 (0.92 to 5.58) |
| Latency (per 0.01 sec)              | 1.42 (1.23 to 1.64)                  | -                   | 1.23 (1.04 to 1.46) | 1.20 (1.01 to 1.43)                              | 1.09 (0.87 to 1.36) |
| Time to Max Dilation (per 0.1 sec)  | 1.43 (1.06 to 1.93)                  | -                   | -                   | -                                                | 1.37 (0.86 to 2.18) |
| <b>Overall</b>                      |                                      |                     |                     |                                                  |                     |
| AUROC                               | 0.78 (0.73 to 0.84)                  | 0.85 (0.79 to 0.90) | 0.86 (0.82 to 0.91) | 0.87 (0.82 to 0.91)                              | 0.87 (0.83 to 0.92) |
| Sensitivity (at specificity=80%)    | 0.68 (0.61 to 0.77)                  | 0.76 (0.66 to 0.84) | 0.74 (0.66 to 0.84) | 0.76 (0.65 to 0.86)                              | 0.77 (0.64 to 0.87) |
| Specificity (at sensitivity=80%)    | 0.47 (0.32 to 0.66)                  | 0.70 (0.54 to 0.88) | 0.70 (0.58 to 0.85) | 0.75 (0.56 to 0.87)                              | 0.77 (0.62 to 0.88) |
